# Supplementary material for: Novel soluble polyazomethines with pendant carbazole and triphenylamine derivatives: preparation, characterization, and optical, electrochemical and electrochromic properties
Source: Royal Society of Chemistry journal article supplement (doi:10.1039/c1py00237f), 2011-01-01
Supplement: c1py00237f.pdf [file c1py00237f.pdf]

## Supporting Information

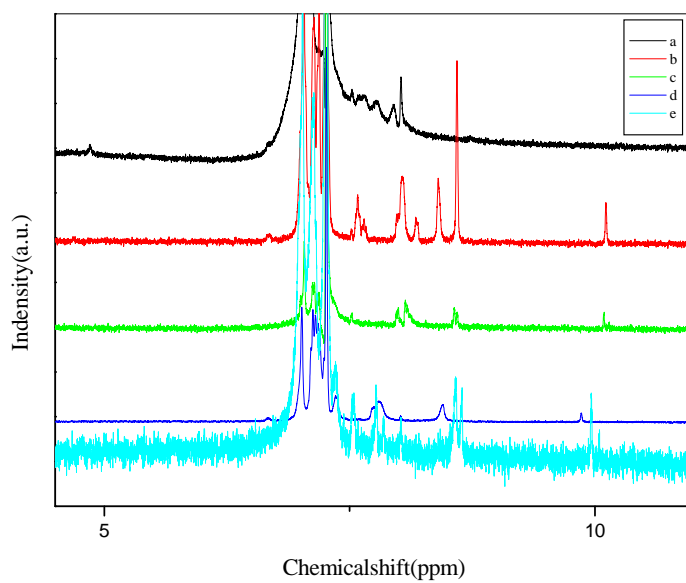

**Fig.S1** <sup>1</sup>H NMR spectra of Pa to Pe

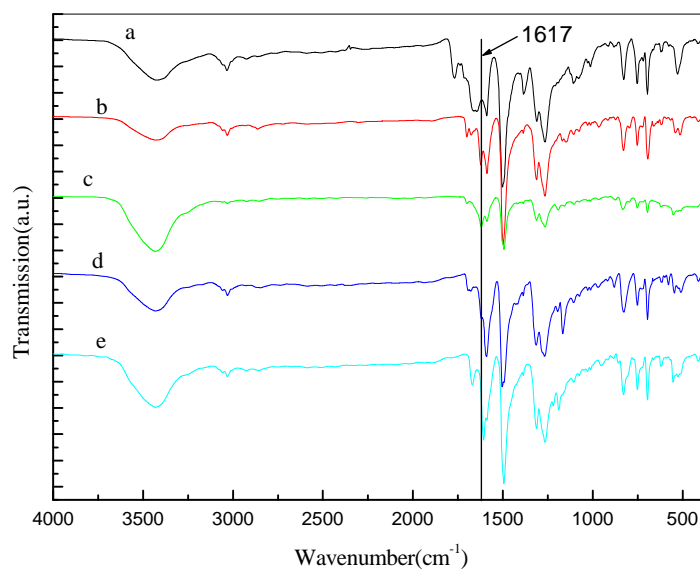

**Fig. S2** FT-IR spectra of Pa to Pe

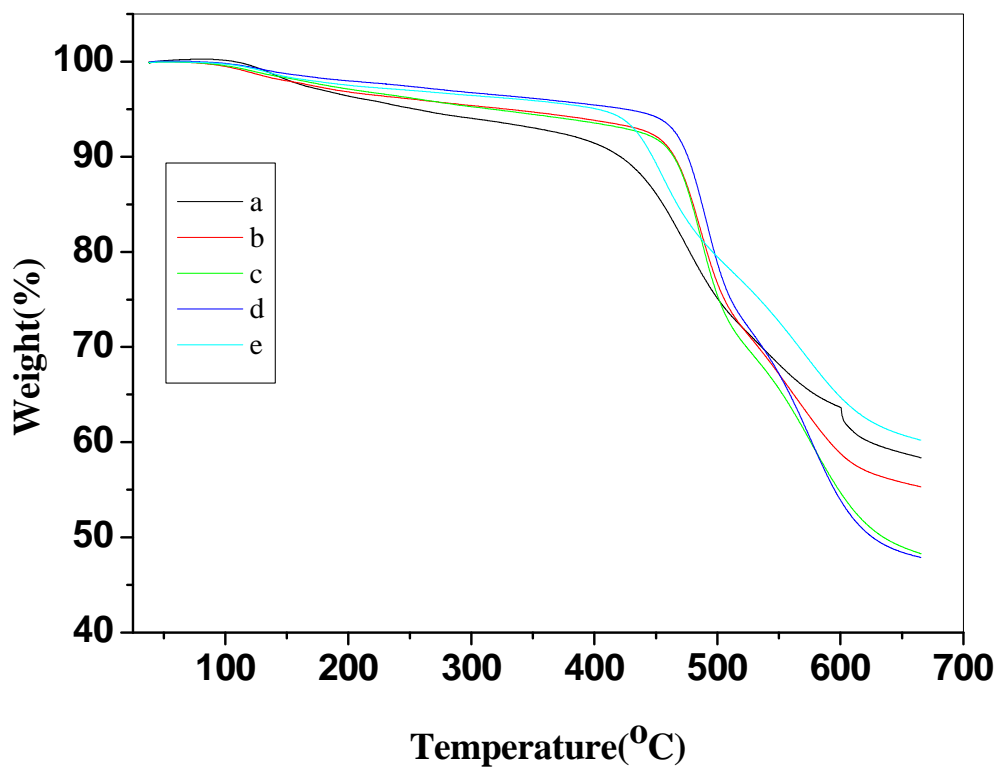

Fig.S3 TG diagrams of Pa to Pe

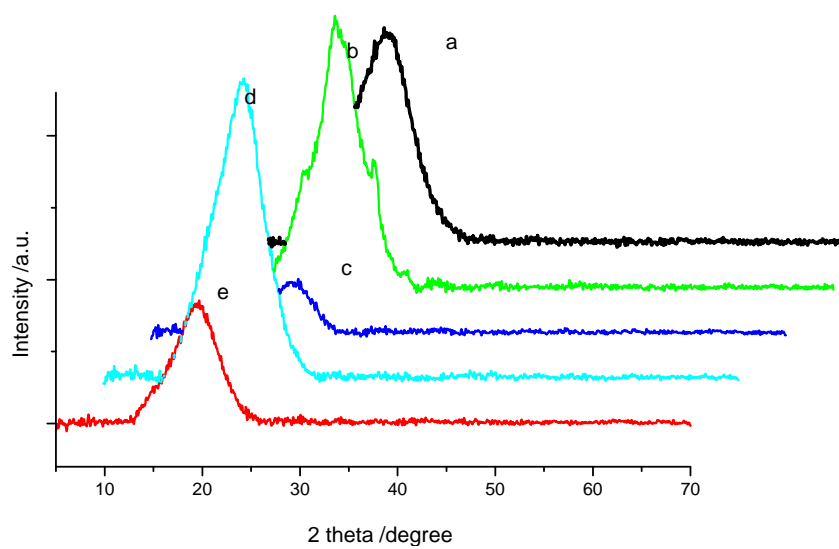

Fig.S4 XRD spectra of Pa to Pe
